# Supplementary material
Source: ML conference proceedings conference paper supplement (https://openreview.net/forum?id=f3zNgKga_ep)
Supplement: supplementary_material [file attachment]

## A Details and hyperparameters

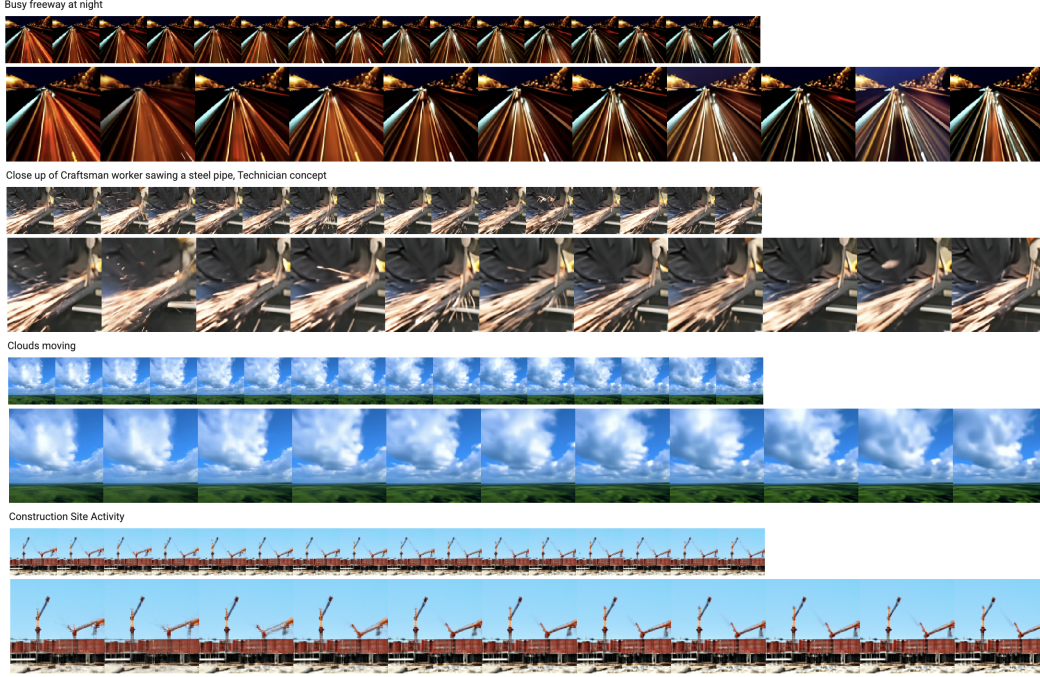

Figure 5: More samples accompanying Fig. 2.

Here, we list the hyperparameters, training details, and compute resources used for each model.

### A.1 UCF101

|                                           |                                                     |
|-------------------------------------------|-----------------------------------------------------|
| Base channels: 256                        | Optimizer: Adam ( $\beta_1 = 0.9, \beta_2 = 0.99$ ) |
| Channel multipliers: 1, 2, 4, 8           | Learning rate: 0.0003                               |
| Blocks per resolution: 2                  | Batch size: 128                                     |
| Attention resolutions: 8, 16, 32          | EMA: 0.9999                                         |
| Attention head dimension: 64              | Dropout: 0.1                                        |
| Conditioning embedding dimension: 1024    | Training hardware: 128 TPU-v4 chips                 |
| Conditioning embedding MLP layers: 4      | Training steps: 260000                              |
| Diffusion noise schedule: cosine          | Joint training independent images per video: 8      |
| Noise schedule log SNR range: $[-20, 20]$ | Sampling timesteps: 256                             |
| Video resolution: 16x64x64 frameskip 1    | Sampling log-variance interpolation: $\gamma = 0.1$ |
| Weight decay: 0.0                         | Prediction target: $\epsilon$                       |

### A.2 BAIR Robot Pushing

|                                           |                                                      |
|-------------------------------------------|------------------------------------------------------|
| Base channels: 128                        | Optimizer: Adam ( $\beta_1 = 0.9, \beta_2 = 0.999$ ) |
| Channel multipliers: 1, 2, 3, 4           | Learning rate: 0.0002                                |
| Blocks per resolution: 3                  | Batch size: 128                                      |
| Attention resolutions: 8, 16, 32          | EMA: 0.999                                           |
| Attention head dimension: 64              | Dropout: 0.1                                         |
| Conditioning embedding dimension: 1024    | Training hardware: 128 TPU-v4 chips                  |
| Conditioning embedding MLP layers: 2      | Training steps: 660000                               |
| Diffusion noise schedule: cosine          | Joint training independent images per video: 8       |
| Noise schedule log SNR range: $[-20, 20]$ | Sampling timesteps: 256 (+256 Langevin cor.)         |
| Video resolution: 16x64x64 frameskip 1    | Sampling log-variance interpolation: $\gamma = 0.0$  |
| Weight decay: 0.01                        | Prediction target: $\mathbf{v}$                      |
| Reconstruction guidance weight: 50        | Data augmentation: left-right flips                  |

### A.3 Kinetics

|                                           |                                                     |
|-------------------------------------------|-----------------------------------------------------|
| Base channels: 256                        | Optimizer: Adam ( $\beta_1 = 0.9, \beta_2 = 0.99$ ) |
| Channel multipliers: 1, 2, 4, 8           | Learning rate: 0.0002                               |
| Blocks per resolution: 2                  | Batch size: 256                                     |
| Attention resolutions: 8, 16, 32          | EMA: 0.9999                                         |
| Attention head dimension: 64              | Dropout: 0.1                                        |
| Conditioning embedding dimension: 1024    | Training hardware: 256 TPU-v4 chips                 |
| Conditioning embedding MLP layers: 2      | Training steps: 220,000                             |
| Diffusion noise schedule: cosine          | Joint training independent images per video: 8      |
| Noise schedule log SNR range: $[-20, 20]$ | Sampling timesteps: 128 (+128 Langevin cor.)        |
| Video resolution: 16x64x64 frameskip 1    | Sampling log-variance interpolation: $\gamma = 0.0$ |
| Weight decay: 0.0                         | Prediction target: $\mathbf{v}$                     |
| Reconstruction guidance weight: 9         |                                                     |

### A.4 Text-to-video

#### Small 16x64x64 model

|                                           |                                                      |
|-------------------------------------------|------------------------------------------------------|
| Base channels: 128                        | Optimizer: Adam ( $\beta_1 = 0.9, \beta_2 = 0.99$ )  |
| Channel multipliers: 1, 2, 4, 8           | Learning rate: 0.0003                                |
| Blocks per resolution: 2                  | Batch size: 128                                      |
| Attention resolutions: 8, 16, 32          | EMA: 0.9999                                          |
| Attention head dimension: 64              | Dropout: 0.0                                         |
| Conditioning embedding dimension: 1024    | Training hardware: 64 TPU-v4 chips                   |
| Conditioning embedding MLP layers: 4      | Training steps: 200,000                              |
| Diffusion noise schedule: cosine          | Joint training independent images per video: 0, 4, 8 |
| Noise schedule log SNR range: $[-20, 20]$ | Sampling timesteps: 256                              |
| Video resolution: 16x64x64 frameskip 1    | Sampling log-variance interpolation: $\gamma = 0.3$  |
| Weight decay: 0.0                         | Prediction target: $\epsilon$                        |

#### Large 16x64x64 model

|                                           |                                                     |
|-------------------------------------------|-----------------------------------------------------|
| Base channels: 256                        | Optimizer: Adam ( $\beta_1 = 0.9, \beta_2 = 0.99$ ) |
| Channel multipliers: 1, 2, 4, 8           | Learning rate: 0.0003                               |
| Blocks per resolution: 2                  | Batch size: 128                                     |
| Attention resolutions: 8, 16, 32          | EMA: 0.9999                                         |
| Attention head dimension: 64              | Dropout: 0.0                                        |
| Conditioning embedding dimension: 1024    | Training hardware: 128 TPU-v4 chips                 |
| Conditioning embedding MLP layers: 4      | Training steps: 700,000                             |
| Diffusion noise schedule: cosine          | Joint training independent images per video: 8      |
| Noise schedule log SNR range: $[-20, 20]$ | Sampling timesteps: 256                             |
| Video resolution: 16x64x64 frameskip 1,4  | Sampling log-variance interpolation: $\gamma = 0.3$ |
| Weight decay: 0.0                         | Prediction target: $\epsilon$                       |

#### Large 9x128x128 model

|                                           |                                                     |
|-------------------------------------------|-----------------------------------------------------|
| Base channels: 128                        | Optimizer: Adam ( $\beta_1 = 0.9, \beta_2 = 0.99$ ) |
| Channel multipliers: 1, 2, 4, 8, 16       | Learning rate: 0.0002                               |
| Blocks per resolution: 2                  | Batch size: 128                                     |
| Attention resolutions: 8, 16, 32          | EMA: 0.9999                                         |
| Attention head dimension: 128             | Dropout: 0.0                                        |
| Conditioning embedding dimension: 1024    | Training hardware: 128 TPU-v4 chips                 |
| Conditioning embedding MLP layers: 4      | Training steps: 800,000                             |
| Diffusion noise schedule: cosine          | Joint training independent images per video: 7      |
| Noise schedule log SNR range: $[-20, 20]$ | Sampling timesteps: 256                             |
| Video resolution: 9x128x128 frameskip 1   | Sampling log-variance interpolation: $\gamma = 0.3$ |
| Weight decay: 0.0                         | Prediction target: $\epsilon$                       |
